# Supplementary material
Source: Springer Nature journal article supplement (https://www.springermedizin.de/resource/supplementary/12874_2004_108_MOESM1_ESM.pdf/9433784)

Percentage of studies

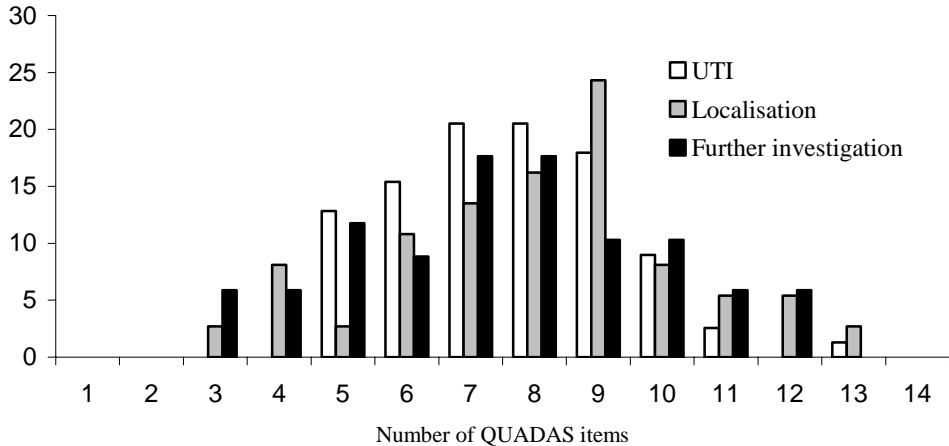

Supplement: MOESM1 [file 9433784]
